# Supplementary material for: Enzymatic Preparation of 2,5-Furandicarboxylic Acid (FDCA)—A Substitute of Terephthalic Acid—By the Joined Action of Three Fungal Enzymes
Source: PubMed Central journal article supplement (PMC5874619; doi:10.3390/microorganisms6010005), 2018-01-09
Supplement: microorganisms-06-00005-s001.pdf [file microorganisms-06-00005-s001.pdf]

## Supplementary material

### 1.1 Enzyme production

#### AAO of *Pleurotus ostreatus*

(30-L stirred tank)

- Medium: 10.0 g glucose (Merck); 1.0 g Na acetate (Merck); 2.0 g yeast extract (Merck); 5.0 g peptone (from soybeans, Merck); 2.0 g  $\text{KH}_2\text{PO}_4$  (Merck); 0.5 g  $\text{MgSO}_4 \times 7 \text{H}_2\text{O}$  (Merck); 0.1 g  $\text{CaCl}_2$  (Merck); 0.01 g  $\text{FeSO}_4 \times 7 \text{H}_2\text{O}$  (Merck); pH 5.2
- Aryl alcohol oxidase (AAO, E.C. 1.1.3.7): oxidation of veratryl alcohol to veratraldehyde at pH 5.0 (Kirk et al., 1986); 310 nm ( $\epsilon = 9,300 \text{ M}^{-1} \text{ cm}^{-1}$ ); 50 mM Na citrate (pH 5.0 or 5.5); 5 mM veratryl alcohol

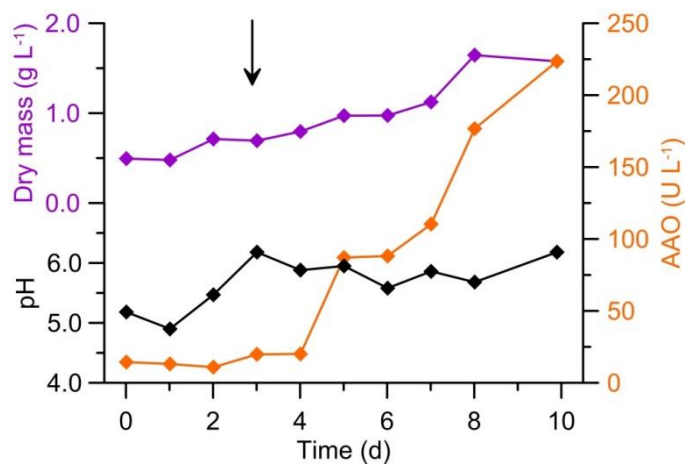

Fig S1: Time course of AAO production by *Bjerkandera adusta* in a stirred-tank bioreactor (with 8 L culture medium); the arrow indicates supplementation with veratryl alcohol to stimulate AAO production. Purple curve - dry mass; black curve – pH; orange curve - *Post*AAO activity

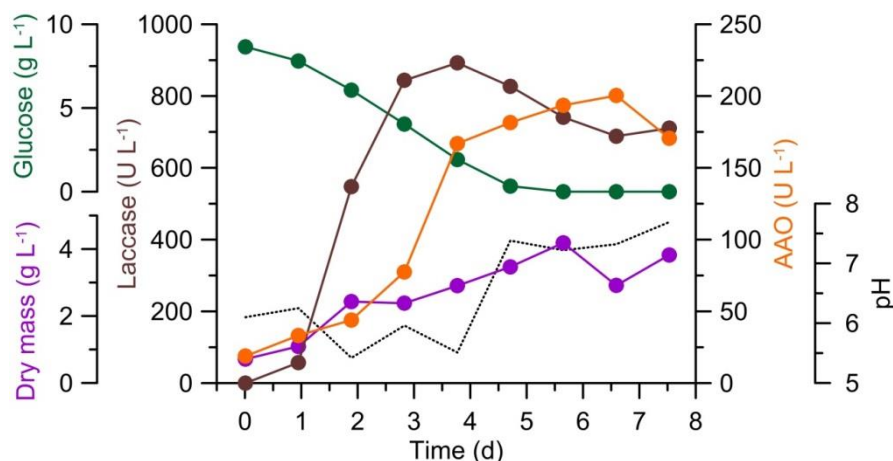

Fig. S2: Time course of AAO production by *Pleurotus ostreatus* in a 30-L stirred tank reactor (20 L medium). Purple curve - dry mass; green curve – glucose concentration; black curve – pH; orange curve - *Post*AAO activity; brown curve – Laccase Activity

## 1.2 Enzyme purification

### Ion-exchange chromatography:

Sample preparation: dilution with 10 mM Na acetate pH 6.0 (resulting in a pH around 7)

Column: **Q-sepharose**<sup>®</sup>, 26 mm x 200 mm, GE Healthcare

Loading buffer: 10 mM Na acetate pH 6.0

Elution buffer: 10 mM Na acetate pH 5.7 + 2 M NaCl

Flow: 13 mL min<sup>-1</sup>, loading with sample pump; washing with 1.5 CV; 50% B within 10 CV; fraction size 7 mL; around 2,700 U *PostAAO* were applied per run → recovery 2,800 U

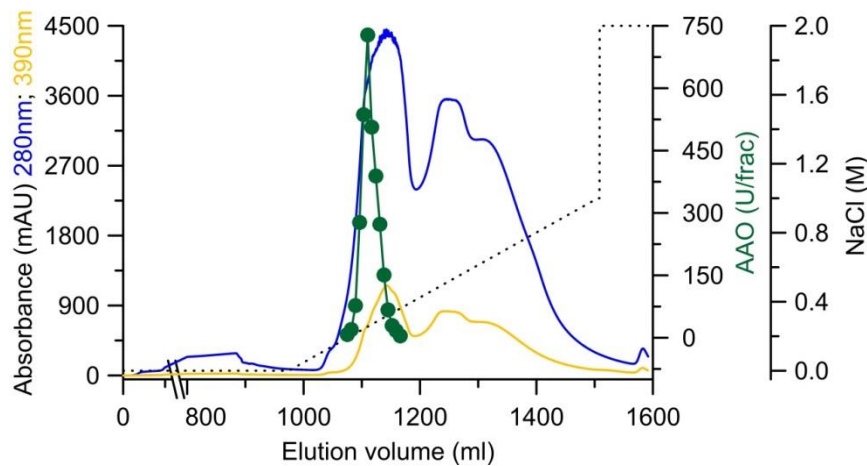

Fig. S3: Elution profile of *PostAAO*; anion exchange chromatography occurred on a Q-sepharose<sup>®</sup> column (26/200) after loading 2,700 U *PostAAO*.

Sample preparation: dilution & purging with 10 mM Na acetate (pH 6) using viva spins: 10 kDa cut-off

Column: **Mono Q**<sup>®</sup>, 10 mm x 100 mm, GE Healthcare

Loading buffer: 10 mM Na acetate pH 5.25

Elution buffer: 10 mM Na acetate pH 5.7 + 2 M NaCl

Flow: 6 mL min<sup>-1</sup>, loading with sample pump; washing with 2.0 CV; 30% B within 15 CV; fraction size 2 mL; around 2,800 U *PostAAO* were applied per run → recovery 2,600 U

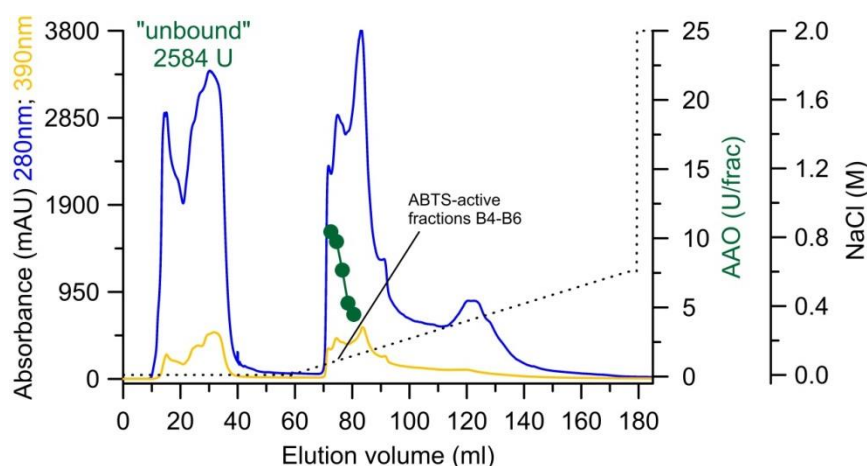

Fig. S4: Elution profile of *PostAAO*; anion exchange chromatography (MonoQ<sup>®</sup> 10/100) after applying 2,800 U *PostAAO*.

Only traces of *PostAAO* bound, probably due to residual salts, but the purification step was nevertheless successful (compare purification table S1). *PostLac*: ABTS oxidizing fractions were pooled (B4-B6), color: bluegreen; "unbound fraction" was concentrated with viva spins: 10 kDa cut-off.

### Size exclusion chromatography:

Sample preparation: dilution with SEC buffer and concentration with viva spins (10 kDa cut-off)

Column: **Sephadex<sup>®</sup>75**; 26 mm x 600 mm, GE Healthcare

Buffer: 50 Na acetate, 100 mM NaCl, pH 6.8

Flow: 2.5 mL min<sup>-1</sup>, loading with a sample loop; fraction size 2 mL

around 2,500 U *Post*AAO were applied in two runs → recovery 2,000 U

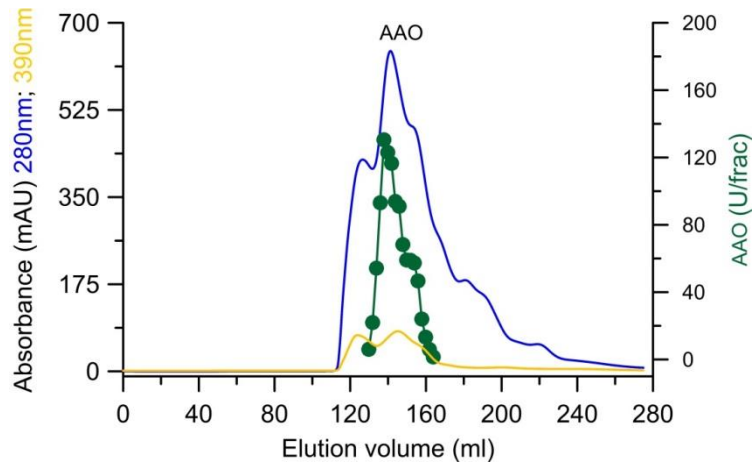

Fig. S5: Elution profile (size exclusion chromatography = SEC) on a Sephadex<sup>®</sup>75 (26/600) column after loading 1,250 U *Post*AAO.

### Ion-exchange chromatography:

Sample preparation: dilution & purging with 10 mM Na acetate (pH 6.0) with viva spins (10 kDa cut-off)

Column: **MonoQ**<sup>®</sup>, 5 mm x 5 mm, GE Healthcare

Loading buffer: 10 Na acetate, pH 6.0

Elution buffer: 10 Na acetate pH 6.0 + 1 M NaCl

Flow: 2 mL min<sup>-1</sup>, loading with sample pump; washing with 2.0 CV; 30% B within 35 CV; fraction size 0.8 mL; around 2,500 U *Post*AAO were applied in four runs → recovery 1,600 U

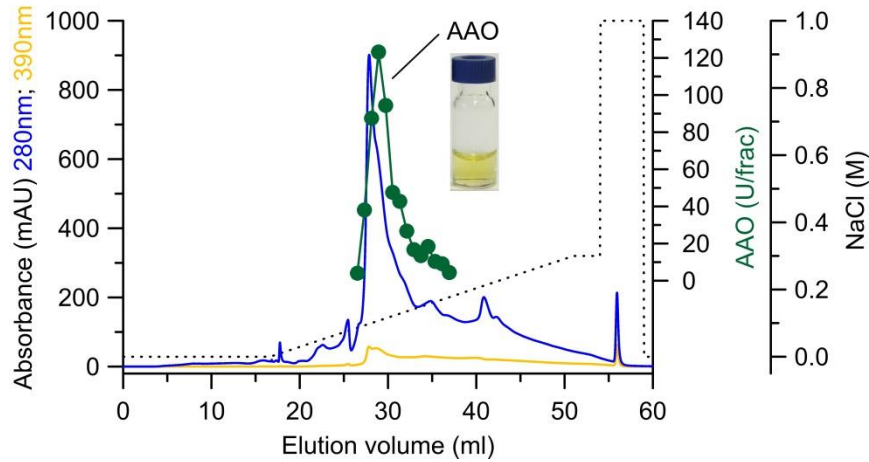

Fig. S6: Elution profile of *Post*AAO (600 U); anion exchange chromatography on MonoQ<sup>®</sup> (5/50).

### Protein purification results:

Protein content: Bradford Assay with Roti<sup>®</sup>-Nanoquant, Carl Roth; 200  $\mu$ L Roti<sup>®</sup>-Nanoquant + 50  $\mu$ L sample in 96-well plates

Activity of aryl alcohol oxidase (AAO, E.C. 1.1.3.7): oxidation of veratryl alcohol to veratraldehyde at pH 5.5; 310 nm ( $\epsilon = 9300 \text{ M}^{-1}\text{cm}^{-1}$ ); 50 mM Na citrate; 5 mM veratryl alcohol

Tab. S1: Purification of AAO from *Pleurotus ostreatus*

| Purification step           | Total activity [U] | Total protein [mg] | Specific activity [U mg <sup>-1</sup> ] | Purification (-fold) | Yield (%) | Volume activity (U mL <sup>-1</sup> ) | Protein conc. (mg mL <sup>-1</sup> ) | Volume [mL] |
|-----------------------------|--------------------|--------------------|-----------------------------------------|----------------------|-----------|---------------------------------------|--------------------------------------|-------------|
| Ultrafiltrate               | 2,710              | 615                | 4.4                                     | 1                    | (100)     | 3.3                                   | 0.75                                 | 820         |
| Q-sepharose <sup>®</sup>    | 2,849              | 245.2              | 11.6                                    | 3                    | 100       | 142.5                                 | 12.26                                | 20          |
| MonoQ <sup>®</sup> (10/100) | 2,584              | 138.27             | 18.7                                    | 4                    | 95        | 172.2                                 | 9.22                                 | 15          |
| Sephadex <sup>®</sup> 75    | 1,785              | 47.92              | 37.2                                    | 8                    | 66        | 223.1                                 | 5.99                                 | 8           |
| MonoQ <sup>®</sup> (5/50)   | 1,662              | 20.63              | 80.6                                    | 18                   | 61        | 302.3                                 | 3.75                                 | 5.5         |

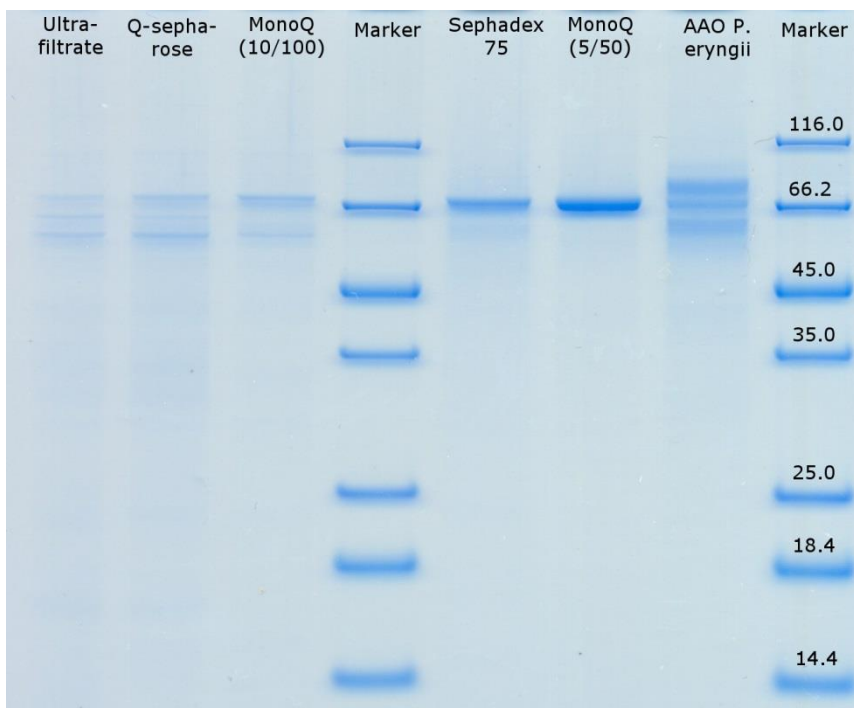

**Fig. S7:** SDS-PAGE of the different purification steps of AAO from *Pleurotus ostreatus* and purified AAO from *Pleurotus eryngii*; marker: Unstained Protein Molecular Weight Marker, Thermo Scientific; NuPAGE® Novex® Bis-Tris Mini-Gels 12%, Invitrogen; Conditions: 45 min, 200 V, 120 mA; staining with Novex® Colloidal Blue Stain Kit, Invitrogen

## 2.1 Analytical method

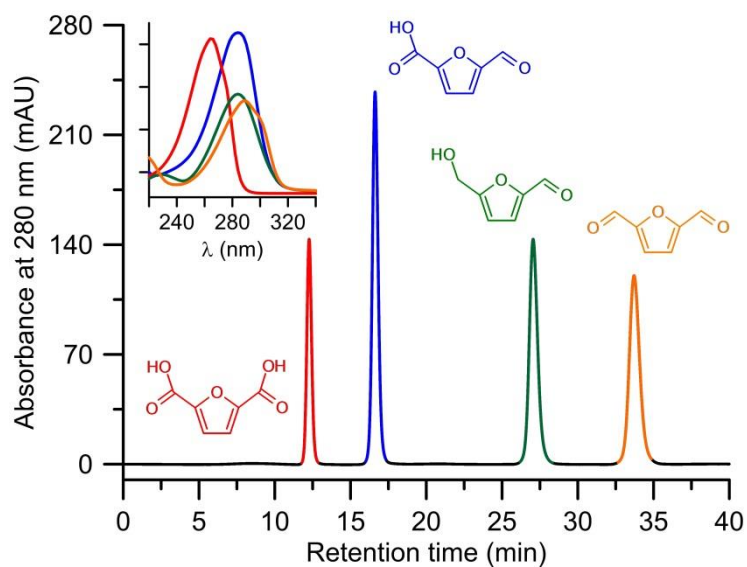

**Fig. S 8:** HPLC elution profile of a mixture containing HMF (green), DFF (orange), FFCA (blue) and FDCA (red); the inset displays the corresponding UV-spectra.

### 3.1 pH optimum of DFF oxidation

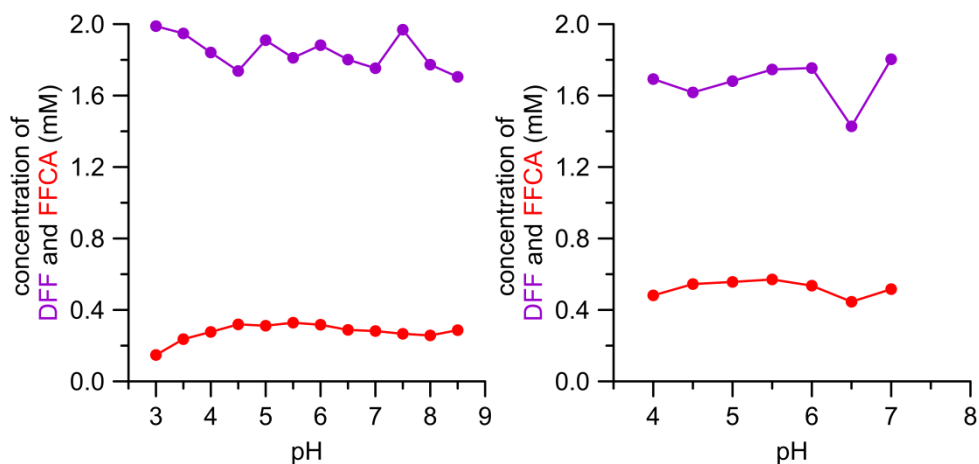

**Fig. S9:** pH dependencies of *PeryAAO* (A) and *PostAAO* (B) for DFF conversion. Violet curve – DFF concentration; red curve - FFCA concentration

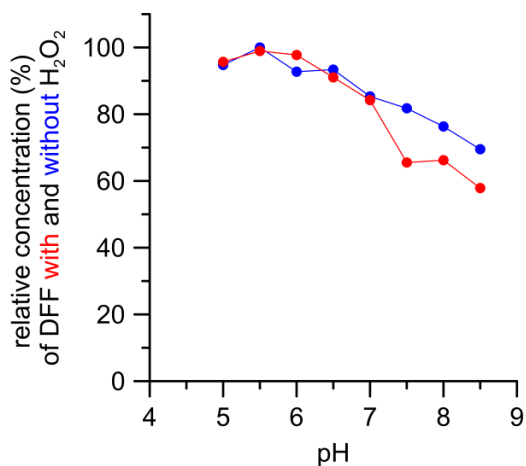

**Fig. S10:** pH dependency of DFF conversion catalyzed by GAO. Blue curve – relative concentration of DFF with  $H_2O_2$ ; red curve – relative concentration of DFF without  $H_2O_2$

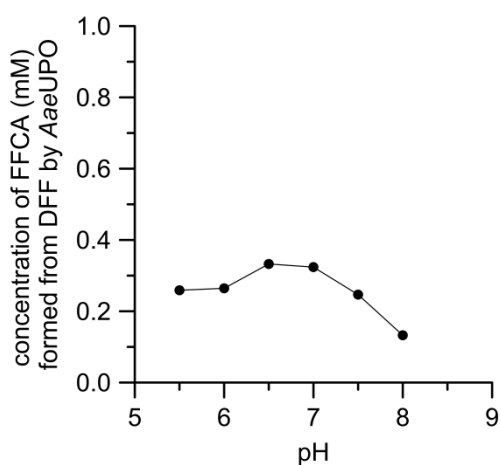

**Fig. S11:** pH dependent DFF oxidation catalyzed by *AaeUPO*. Black curve – DFF concentration

### 3.2 Calculation of apparent kinetic constants

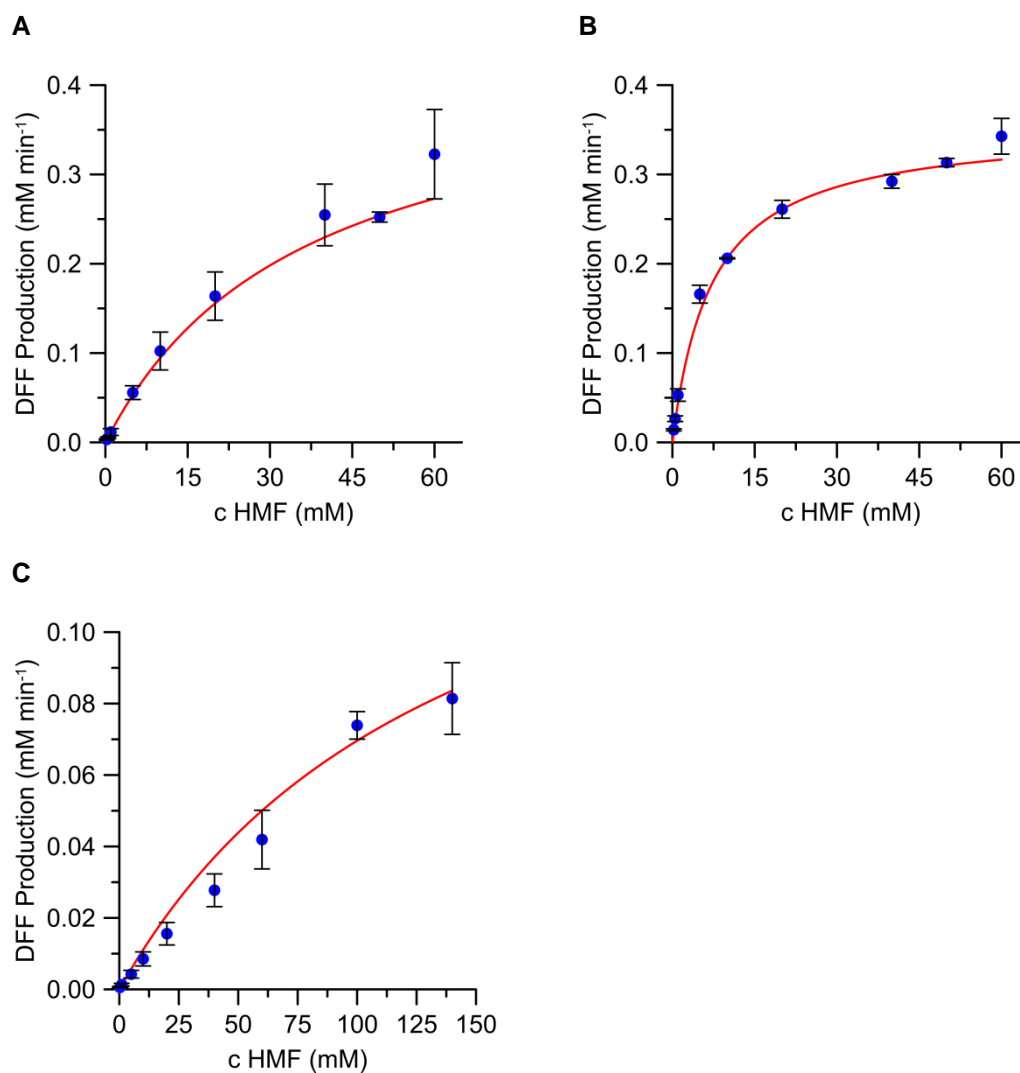

**Fig. S12:** Michaelis-Menten plots and their Lineweaver-Burk derivatives for the formation of DFF (from HMF) by *PeryAAO* (A), *PostAAO* (B) and *GAO* (C)

#### Setup:

**pH:** 2 mM HMF, 0.6 mg mL<sup>-1</sup> GAO, KP<sub>i</sub> 30 mM, 1 μL NOVOZYMES Catalase (left), shaking for 2 h in 1.5-mL Eppendorf tubes

**MM-Kin.:** at pH 6.0, 4 μM GAO, stopped with Na azide (1 mM)

**pH:** 2 mM HMF, 60 μg mg mL AAO, KP<sub>i</sub> 30 mM, 1 μL , shaking for 2 h in 1.5-mL Eppendorf-tubes

**MM-Kin.:** at pH 6.0, 2 μM AAO, stopped with Na azide (1 mM)

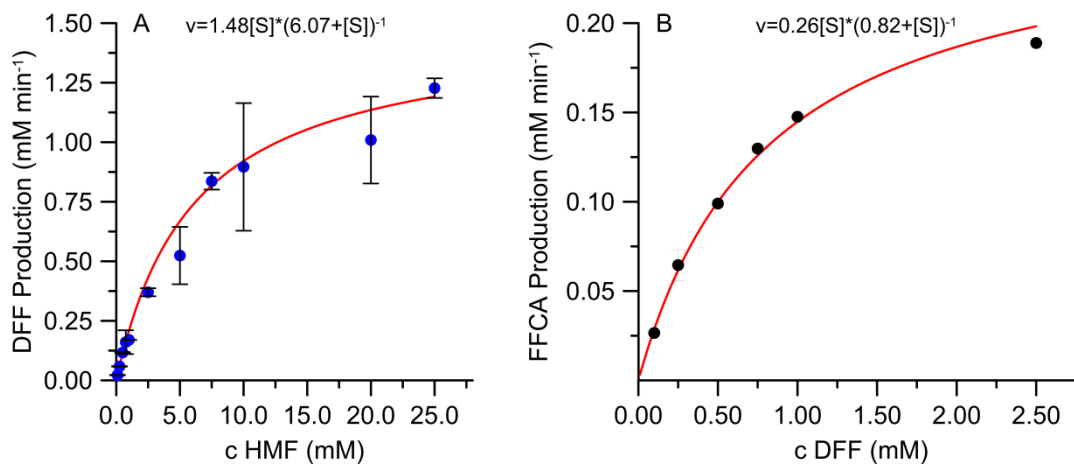

**Fig. S13:** Michaelis-Menten plots and their Lineweaver-Burk derivatives for the formation of DFF (A) and FFCA (B) by *AaeUPO*.

**Setup MM-Kin.:** at pH 6.0, 0.111  $\mu\text{M}$  *AaeUPO*, stopped with Na azide (1 mM)

### 3.3 AAO-dependent FFCA-oxidation with regard to varying $\text{H}_2\text{O}_2$ concentration

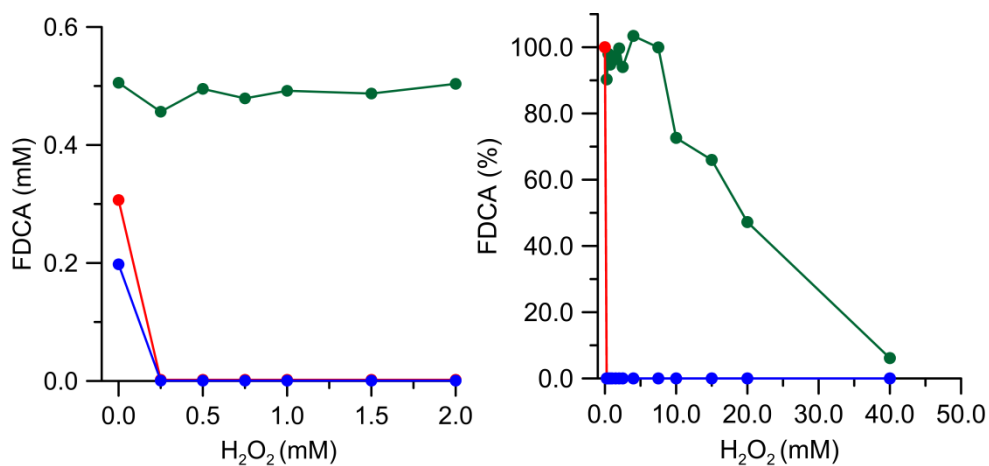

**Fig. S14:** FDCA formation catalyzed by *BaduAAO* (red), *PostAAO* (blue) and *PeryAAO* (green) with regard to different concentrations of  $\text{H}_2\text{O}_2$  supplied (left) and relative FDCA production of *BaduAAO* (red), *PosAAO* (blue) and *PeryAAO* (green) (right).

**Tab. S2:** FDCA formation catalyzed by selected AAOs with regard to pH

|                | FDCA [mM]  |            |            |
|----------------|------------|------------|------------|
|                | pH 6       | pH 7       | pH 7.5     |
| <i>PeryAAO</i> | 0.008±0.00 | 1.706±0.21 | 0.903±0.09 |
| <i>PostAAO</i> | 0.004±0.00 | 0.012±0.00 | 0.004±0.00 |
| <i>BaduAAO</i> | 0.067±0.01 | 0.605±0.11 | 1.583±0.23 |
